# Supplementary material
Source: ML conference proceedings conference paper supplement (https://openaccess.thecvf.com/content/ICCV_2019/html/Esser_Unsupervised_Robust_Disentangling_ICCV_2019_paper.html)
Supplement: Supplementary file 1 [file Esser_Unsupervised_Robust_Disentangling_ICCV_2019_supplemental.zip]

Archive with 5 entries (4 files):
- 3555-supp/
- 3555-supp/bbc.avi
- 3555-supp/3555-supp.pdf
- 3555-supp/ntu.avi
- 3555-supp/norb.avi
